1        **Genotype-matched Newcastle disease virus vaccine confers improved**  
2        **protection against genotype XII challenge: The importance of cytoplasmic**  
3        **tails in viral replication and vaccine design**

4

5        Ray Izquierdo-Lara<sup>1,2,\*</sup>, Ana Chumbe<sup>1,2</sup>, Katherine Calderón<sup>1</sup>, Manolo Fernández-Díaz<sup>1</sup>,  
6        Vikram N. Vakharia<sup>3</sup>

7

8

9        <sup>1</sup> FARVET S.A.C. Carretera Panamericana Sur N° 766 Km 198.5, Chincha Alta 11702, Ica,  
10        Peru.

11        <sup>2</sup> Universidad Nacional Mayor de San Marcos, School of Veterinary Medicine, San Borja,  
12        Lima, Peru.

13        <sup>3</sup> Institute of Marine & Environmental Technology. University of Maryland - Baltimore  
14        County, 701 East Pratt St. Baltimore, MD 21202. USA

15

16        \* Corresponding author:

17        Email: ray.izquierdo@unmsm.edu.pe

18

## 19 **Abstract**

20           Although typical Newcastle disease virus (NDV) vaccines can prevent mortality,  
21 they are not effective preventing viral shedding. To overcome this, genotype-matched  
22 vaccines have been proposed. To date, this approach has never been tested against genotype  
23 XII strains. In this study, we generated and assessed the protection against genotype XII  
24 challenge of two chimeric NDV vaccine strains (rLS1-XII-1 and rLS1-XII-2). The rLS1-  
25 XII-1 virus has the complete fusion protein (F) and the hemmagglutinin-neuraminidase (HN)  
26 open reading frames replaced with those from genotype XII strain NDV/peacock/Peru/2011  
27 (PP2011) in a recombinant LaSota (rLS1) backbone. For rLS1-XII-2 cytoplasmic tails of F  
28 and HN proteins were restored to those of rLS1. *In vitro* studies showed that rLS1-XII-2  
29 and the parental rLS1 strains replicate at higher efficiencies than rLS1-XII-1. In the first  
30 vaccine/challenge experiment, SPF chickens vaccinated with rLS1-XII-1 virus showed only  
31 71.3% protection, whereas, rLS1 and rLS1-XII-2 vaccinated chickens were fully protected.  
32 In a second experiment, both rLS1-XII-2 and the commercial vaccine strain LaSota induced  
33 100% protection. However, rLS1-XII-2 virus significantly reduced viral shedding, both in  
34 the number of shedding birds and in quantity of shed virus. In conclusion, we have  
35 developed a vaccine candidate capable of fully protecting chickens against genotype XII  
36 challenges. Furthermore, we have shown the importance of cytoplasmic tails in virus  
37 replication and vaccine competence.

38 **Keywords:** Newcastle disease virus, genotype XII, cytoplasmic tails, vaccine, viral  
39 shedding

## 40 Introduction

41 Newcastle disease virus (NDV) is a widely distributed virus that affects poultry and  
42 other avian species [1]. NDV belongs to the order of Mononegavirales, family  
43 Paramyxoviridae and genus Avulavirus [2]. NDV, formerly known as the Avian  
44 Paramyxovirus type-1, is formally known as the *Avian Avulavirus 1* (AAvV-1) since 2016  
45 [<https://talk.ictvonline.org/taxonomy/>]. NDV has a nonsegmented single-stranded negative-  
46 sense RNA genome of 15,186 bp in length, which follows the rule-of-six [3]. NDV genome  
47 encodes six structural genes: Nucleoprotein (N), phosphoprotein (P), matrix (M), fusion  
48 (F), hemagglutinin-neuraminidase (HN) and large polymerase (L) [4]. From these proteins,  
49 M, HN and F form the envelope. The M protein is located at the inner face of the viral  
50 membrane and is responsible to drive the viral budding and virion assembly process [5].  
51 HN and F proteins are surface glycoproteins anchored to the viral envelope. Both HN and F  
52 are incorporated into the virions via the interaction of their cytoplasmic tails with the M  
53 protein [6,7]. The HN protein mediates the attachment of the virus to the host cell receptor,  
54 and the F protein mediates fusion of viral and host cell membranes [3]. The F protein  
55 requires to be cleaved into F1 and F2 prior to fusion with cell membranes [8]. The F protein  
56 cleavage site of avirulent (lentogenic) strains exhibit a dibasic motif (i.e. <sup>112</sup>GRQGRL<sup>117</sup>),  
57 while virulent (mesogenic and velogenic) strains exhibit a polybasic motif (i.e.  
58 <sup>112</sup>RRQKRF<sup>117</sup>) [8,9].

59 Based on the complete sequence of the F gene, NDV strains are classified into two  
60 classes I and II [10]. Class I contains a single genotype, and strains have been isolated  
61 mainly from wild birds and are generally lentogenic [10]. Class II contains at least 18

62 genotypes (I-XVIII), and they can be lentogenic, mesogenic or velogenic [10,11]. Based on  
63 Diel et al. (2012) classification rules, an evolutionary distance between 3% and 10% among  
64 clades within a genotype allows its subdivision into subgenotypes [10]. Commonly vaccine  
65 strains (i.e. LaSota) belong to genotypes I and II and are used all over the world. On the  
66 other hand, genotype XII strains are highly virulent and have been isolated from Peru,  
67 Colombia, China and Vietnam [12–15]. So far, at least three subgenotypes are  
68 distinguished within genotype XII: XIIa, XIIb and XIIc. Subgenotype XIIa strains have  
69 been isolated only in South America (Peru and Colombia) [13–15], XIIb strains have been  
70 isolated only in the province of Guangdong in China [10,16] and XIIc strains were recently  
71 reported in Vietnam [12]. XIIc is a potential subgenotype composed of strains isolated  
72 between 1986 and 2005, nevertheless only partial sequences of the F gene are available for  
73 these strains, therefore it cannot be consider as a proper subgenotype yet [13]. In Peru, XIIa  
74 is the only genotype isolated so far [13] and despite intensive vaccination campaigns,  
75 several outbreaks are reported every year [17], even in vaccinated flocks. This can be  
76 explained by antigenic differences between vaccine and genotype XII circulating strains.  
77 Amino acid identities of F and HN proteins within subgenotype XIIa is above 99%, and  
78 within overall genotype XII strains are above 90% (Table 1). While F and HN protein  
79 sequence identities between XIIa and vaccine strains, as LaSota, are only between 80 and  
80 90% (Table 1). Hence, it is reasonable to think that vaccines could be improved by  
81 matching their antigenicity with those of field strains.

82

83

84 **Table 1. Sequence identities between PP2011 and other representative NDV strains.**

|                        | Genotype | Acc. N°  | Strain                    | % Identities |      |            |      |      |      |      |
|------------------------|----------|----------|---------------------------|--------------|------|------------|------|------|------|------|
|                        |          |          |                           | Nucleotide   |      | Amino acid |      |      |      |      |
|                        |          |          |                           | Genome       | N    | P          | M    | F    | HN   | L    |
| <b>Similar strains</b> | XIIa     | JN800306 | poultry/Peru/1918-03/2008 | 98,7         | 99,3 | 98,9       | 99,1 | 99,4 | 99,1 | 99,3 |
|                        | XIIb     | KC551967 | Goose/Guangdong/2010      | 90,7         | 95,2 | 85,3       | 95,0 | 95,8 | 91,7 | 96,9 |
|                        | XIIb     | KC152048 | GD450/2011                | 90,7         | 95,7 | 84,8       | 95,0 | 95,8 | 91,7 | 96,9 |
|                        | XIIb     | KC152049 | GD1003/2010               | 90,7         | 95,7 | 85,5       | 95,0 | 96,0 | 91,9 | 96,9 |
|                        | XIIId    | MG869272 | NCXMT/Vietnam/2014        | NA           | NA   | NA         | NA   | 96,0 | NA   | NA   |
| <b>Vaccine viruses</b> | Ib       | AY562991 | Ireland/Ulster/67         | 84,3         | 93,6 | 80,5       | 89,8 | 89,6 | 81,9 | 94,4 |
|                        | II       | AY225110 | V4                        | 84,0         | 93,8 | 80,5       | 92,3 | 90,4 | 81,6 | 94,5 |
|                        | II       | EU289028 | VG/GA                     | 82,1         | 91,8 | 78,4       | 89,2 | 87,3 | 85,4 | 93,1 |
|                        | II       | AF309418 | B1                        | 82,1         | 91,8 | 78,2       | 89,2 | 87,7 | 85,2 | 93,1 |
|                        | II       | Y18898   | Clone30                   | 82,1         | 92,0 | 78,9       | 89,0 | 88,0 | 85,6 | 93,1 |
|                        | II       | AF077761 | LaSota                    | 82,1         | 91,6 | 79,5       | 89,0 | 87,9 | 85,1 | 93,3 |

85 N.A. = not available.

86

87 In non-vaccinated chickens, virulent strains are capable to produce up to 100%  
88 morbidity and mortality [1]. While classical vaccines are capable to prevent the disease  
89 under experimental conditions, they fail to prevent viral shedding [18–20]. Many authors  
90 have suggested that antigenic matches of F and HN proteins between vaccine and challenge  
91 strains are capable to improve vaccine protection by significantly reducing viral sheading  
92 [21,22]. However, some other authors have suggested that genotype mismatch is not the  
93 main reason for vaccination failure in immunocompetent chickens [23,24]. To date, live-  
94 attenuated genotype-matched vaccines have been tested for genotypes V, VII and XI [21]–  
95 [27]. However, no data has been recorded whether genotype XII homologous vaccine is  
96 capable to induce a better protection than commonly used vaccines.

97 To assess whether genotype XII matched vaccine can improve protection against a

98 homologous challenge, we generated by reverse genetics two recombinant NDV (rNDV)  
99 strains containing both F and HN proteins from the genotype XIIa strain  
100 NDV/peacock/Peru/2011 (PP2011) [14] in the rLS1 backbone [28]. In the first rNDV,  
101 rLS1-XII-1 virus, complete F and HN open reading frames (ORFs) were replaced with  
102 those from the PP2011. For the second virus, rLS1-XII-2, only the ecto- and  
103 transmembrane domains of the F and HN proteins were replaced in rLS1. To reduce  
104 pathogenicity in both viruses, the F cleavage site was changed from the polybasic motif  
105 <sup>112</sup>RRQKRF<sup>117</sup> to the dibasic motif <sup>112</sup>GRQGRL<sup>117</sup>. In the first vaccine/challenge  
106 experiment, rLS1-XII-1 and -2 viruses were compared against the parental rLS1. In the  
107 second experiment, rLS1-XII-2 virus and the commercial vaccine LaSota strain were  
108 compared for its capacity to induce protection, specific antibodies and reduce viral  
109 shedding.

110

## 111 **Materials and methods**

### 112 **Cell lines, viruses and animals**

113 DF-1 (derived from chicken fibroblasts) were maintained in Dulbecco's modified  
114 Eagle medium (DMEM) F12 (HyClone), supplemented with 5% heat-inactivated fetal  
115 bovine serum (FBS) and 2.5% chicken serum (ChkS) (Sigma–Aldrich). Vero (monkey  
116 kidney) cells were maintained in DMEM F12 supplemented with 5% FBS. Both cells lines  
117 were cultured with 100 U/mL of penicillin and 100 µg/mL of streptomycin at 37 °C in an  
118 atmosphere of 5% CO<sub>2</sub>. The virulent strain NDV/peacock/Peru/2011 (PP2011) (Genbank

119 accession number: KR732614), belonging to genotype XII, was previously isolated in Peru  
120 [14]. We previously developed the recombinant rLS1 vector [28]. The rLS1-XII-1 and  
121 rLS1-XII-2 were engineered and rescued in this study using the rLS1 strain as a backbone  
122 vector. All viruses were grown in 9- or 10- old specific pathogen free (SPF) chicken eggs  
123 (Charles River Laboratories, Wilmington, MA, USA). After 3 days of infection or egg  
124 death, allantoic fluids (AFs) were harvested, clarified, aliquoted, and stored at -80 °C.  
125 Titration was performed by median tissue culture infectious dose (TCID<sub>50</sub>). All protocols  
126 related to animal use were performed under the guidelines of the Committee of Ethics and  
127 Animal Welfare (CEBA) of the Faculty of Veterinary of the Universidad Nacional Mayor  
128 de San Marcos (UNMSM), Lima, Peru.

129

## 130 **Plasmid construction and virus recovery**

131 The previously constructed pFLC-LS1 plasmid [28], containing the rLS1 genome,  
132 was used as backbone to clone rLS1-XII-1 and rLS1-XII-2 genomes. Fragments containing  
133 F and HN genes were chemically synthesized (Genscript, New Jersey, USA). The F<sub>0</sub>-XII  
134 fragment contains the complete ORF of the F protein from PP2011 strain and is flanked by  
135 the intergenic regions of rLS1 strain, including BssHII and MluI restriction sites at the  
136 ends. Five nucleotides in the cleavage site were changed to reduce pathogenicity, as  
137 consequence the polybasic motif <sup>112</sup>RRQKRF<sup>117</sup> was replaced by the dibasic motif  
138 <sup>112</sup>GRQGRL<sup>117</sup>. The HN-XII fragment contains, from 5' to 3', a part of the F-HN intergenic  
139 region of the rLS1 parental vector, the complete ORF of the HN protein from PP2011 strain  
140 and the complete HN-L intergenic region, plus part of the L ORF of the rLS1 strain and is

141 flanked by MluI and BsiWI restriction sites. Both F<sub>0</sub>-XII and HN-XII were sequentially  
142 inserted in pFLC-LS1 vector to generate the pLS1-XII-1 plasmid. F<sub>0</sub>-XII/CT-II and HN-  
143 XII/CT-II fragments were designed to contain similar characteristics as F<sub>0</sub>-XII and HN-  
144 XII, respectively, but with the cytoplasmic tails from the parental rLS1 vector (Fig 1). F<sub>0</sub>-  
145 XII/CT-II differs from F<sub>0</sub>-XII in that the sequence corresponding to the cytoplasmic tail of  
146 the F gene (29 amino acids at the C-terminal) was replaced by the one from the rLS1 strain.  
147 HN-XII/CT-II differs from HN-XII in that the sequence corresponding to the cytoplasmic  
148 tail of HN gene (22 amino acids at the N-terminal) was replaced by the one from the rLS1  
149 strain. F<sub>0</sub>-XII/CT-II and HN-XII/CT-II fragments were sequentially cloned into pFLC-LS1  
150 vector to generate the pLS1-XII-2 plasmid. All plasmids were purified using the Plasmid  
151 Mini Kit (QIAGEN), stored at -20 °C and sequenced. The rLS1-XII-1 and rLS1-XII-2  
152 viruses were recovered as previously described [28]. Briefly, Vero cells plated at 90%  
153 confluence in 12-well plates were transfected with the supporting plasmids (pCI-N, pCI-P  
154 and pCI-L) plus either of the plasmids containing the viral genomes. On the next day, AF  
155 was added to a final concentration of 5% and cells were incubated for 4 days more. Cell  
156 supernatant was inoculated into 8-days old SPF chicken embryonated eggs and incubated  
157 for 4 days. AFs were harvested, clarified, and aliquoted and stored at -80 °C. Virus  
158 recovery was first confirmed by hemmagglutination assay (HA). To confirm the identity of  
159 the viruses, RNA was isolated from AF and a fragment of 708 bp was amplified and  
160 sequenced with primers F.1437\_fw (5'-CAAGTTGGCAGAAAGCAACA-3') and  
161 HN.296\_rv (5'-GGATTCAAGTGCCACCTGTT-3'). Genetic maps of the parental virus  
162 (rLS1), the virulent wild-type NDV belonging to genotype XII (PP2011), and the genotype  
163 XII vaccine candidates (rLS1-XII-1 and rLS1-XII-2) are showed in Fig 1. The  
164 pathogenicity of the recovered viruses was determined by the intracerebral pathogenicity



165 index (ICPI) and mean death time (MDT) were carried out on 1-day-old SPF chickens  
166 (Charles River Laboratories) and 10-day-old embryonated chicken eggs, respectively, using  
167 standard procedures [29].

168 **Fig 1. Viral gene maps.** The gene map at the top is the parental NDV strain rLS1 and  
169 shows the three unique restriction sites used for swapping F and HN gene ORFs. The next  
170 map illustrates the wild-type strain PP2011 (genotype XII). The last two maps are the two  
171 chimeric derivative viruses. The rLS1-XII-1 has the complete F and HN ORFs swapped by  
172 those of the PP2011 strain, whereas rLS1-XII-2 has the cytoplasmic tails restored to those  
173 of the original rLS1 strain. The F protein cleavage sites are shown.

#### 174 ***In vitro* growth kinetics in DF-1 cells**

175 DF-1 cells were seeded at 50-60% confluence in 12-well plates and infected with  
176 rLS1, rLS1-XII-1 or rLS1-XII-2 at a multiplicity of infection (MOI) of 0.05. Cells were  
177 cultured with DMEM supplemented with 1% FBS and 5% AF with 5% CO<sub>2</sub> at 37 °C.  
178 Supernatants were collected at 12, 24, 36, 48, 60 and 72 hours post-infection (hpi).  
179 Collected supernatants were quantified in DF-1 cells by TCID<sub>50</sub>. To clearly see the  
180 infection in monolayers, cells were stained with a monoclonal antibody against the NDV  
181 ribonucleoprotein (RNP) (cat. n° ab138719, Abcam, USA) as a first antibody and a goat  
182 polyclonal antibody anti-mouse IgG labeled with Alexa Fluor 594 (cat n° ab150116,  
183 Abcam) as a secondary antibody.

184

#### 185 **Immunofluorescence**

186 DF-1 cells were infected with either rLS1, rLS1-XII-1, rLS1-XII-2 viruses or mock-  
187 infected at a MOI of 0.01 for 1 hour, washed with Dulbecco's phosphate-buffered saline  
188 (DPBS) and covered with DMEM semisolid media (0.75 % methylcellulose + 2 % FBS +  
189 5% AF). Cells were incubated for 24, 48 and 72 hpi. Then, cells were washed 3 times with  
190 DPBS and fixed with 4% paraformaldehyde in DPBS for 15 min at room temperature (RT).  
191 Fixed cells were blocked with 5% Bovine Serum Albumin (BSA) (Sigma-Aldrich) in  
192 DPBS for 30 min at RT. Cells were incubated for 2 hours with a chicken polyclonal  
193 antibody against NDV (Charles River Laboratories) in a 1:2000 dilution in a solution of 5%  
194 BSA in DPBS. After washing, cells were incubated for 1 hour with goat anti-chicken IgY-  
195 Alexa Fluor® 594 (cat n° ab ab150172, Abcam) at a final concentration of 1 µg/mL in a  
196 solution of 5% BSA in DPBS, and then washed. Cells were examined under the  
197 Observer.A1 fluorescence microscope (Carl Zeiss, Germany). Images were taken at 400X  
198 magnification with the AxioCam MRc5 camera (Carl Zeiss, Germany).

199

## 200 **First vaccination/challenge assay with recombinant vaccine**

### 201 **viruses**

202 A total of 52 one-day-old SPF chicks were divided into four groups. All groups  
203 were immunized twice at the 1st and the 14th days. Birds in the control group (n = 10) were  
204 mock-vaccinated with 30 µl of DPBS. Birds in groups rLS1 (n = 14), rLS1-XII-1 (n = 14)  
205 and rLS1-XII-2 (n = 14) were vaccinated via eye-drop route with 30 µl/bird of 10<sup>7</sup> 50% egg  
206 infective dose (EID<sub>50</sub>/ml) of live rLS1, rLS1-XII-1 and rLS1-XII-2 viruses, respectively. At  
207 28 days of age, chickens were challenged with 10<sup>5</sup> median lethal dose (LD<sub>50</sub>) of PP2011

208 stock in 50  $\mu$ l/bird. Chickens were observed for 10 days post-challenge (dpc). To assess  
209 viral shedding, oral and cloacal swabs were collected from all surviving chickens at 2, 4  
210 and 7 dpc. Swabs were resuspended in 500  $\mu$ l of DMEM media supplemented with 10%  
211 FBS and penicillin-streptomycin, then clarified by centrifugation at 20000 RCF per 10 min.  
212 100  $\mu$ l of each swap were inoculated into 10-day-old SPF chicken eggs and incubated for 3  
213 days or until dead, then AFs were evaluated for HA to confirm presence of NDV.

214

## 215 **Second vaccine/challenge: Comparison between rLS1-XII-2 and** 216 **the commercial LaSota vaccine strain**

217 Based on the results of the first experiment, we decided to further continue with the  
218 evaluation of the rLS1-XII-2 and compare it against the commercial vaccine LaSota. A  
219 total of 38 seven-day-old SPF chickens were divided into three groups. Birds in the control  
220 group (n = 10) were mock-vaccinated with 30  $\mu$ l of DPBS. Birds in groups LaSota (n = 14)  
221 and rLS1-XII-2 (n = 14) were vaccinated via eye-drop route with 30  $\mu$ l/bird of live LaSota  
222 and rLS1-XII-2 ( $10^7$  EID<sub>50</sub>/ml), respectively. At 28 dpv, chickens were challenged with  $10^5$   
223 LD<sub>50</sub> of PP2011 stock in 50  $\mu$ l per bird. Chickens were observed for 10 days post-challenge  
224 (dpc). Serum samples were collected via wing-web bleeding at 2 and 4 weeks post  
225 vaccination. Antibody titers were calculated by neutralization test against either the  
226 challenge strain (PP2011) or a genotype II vaccine strain (rLS1-eGFP) as described  
227 previously [28]. Viral shedding was assessed in the same way as described above.  
228 Additionally, viral titers of HA positive swabs were calculated by plaque assay.

## 229 **Statistical Analysis**

230 All statistical analysis were performed in GraphPad Prism 6.01 (GraphPad Software  
231 Inc., San Diego, CA). The differences in viral shedding between vaccinated groups were  
232 compared by t test. Mann-Whitney test was utilized to assess the differences in serum  
233 neutralization titers between vaccinated groups. Statistical significances were represented  
234 as \* $p < 0.05$ , \*\* $p < 0.01$  and \*\*\* $p < 0.001$ .

235

## 236 **Results**

### 237 **Presence of homologous cytoplasmic tails in F and HN proteins** 238 **results in a higher viral replication compared to heterologous** 239 **cytoplasmic tails**

240 In order to develop a genotype XII-matched vaccine, we engineered two chimeric  
241 NDVs. In rLS1-XII-1, complete F and HN genes were replaced in the rLS1 backbone for  
242 those of the PP2011 strain. In rLS1-XII-2 only the ecto- and transmembrane domains were  
243 replaced with those of PP2011. Both viruses were rescued and replicated in embryonated  
244 eggs at  $10^{8.8}$  and  $10^{9.7}$  EID<sub>50</sub>/ml, respectively (see Table 2). However, it is worth to mention  
245 that rLS1-XII-1 was detected by HA only after a second passage in embryonated eggs,  
246 while rLS1-XII-2 was HA-positive after only one passage (directly inoculated from  
247 transfection supernatant). Growth curves in DF-1 cells showed that parental rLS1 replicates  
248 3.5 - 81.3 and 0 - 12.8 fold more compared to rLS1-XII-1 and rLS1-XII-2, respectively (Fig

249 2a). At the 36 hpi, there was no difference in the replication between rLS1 and rLS1-XII-2.  
250 Thus, in general, rLS1 replicates at higher titers than the rLS1-XII-2 and this one higher  
251 than rLS1-XII-1. Additionally, immunofluorescence evaluated at 24, 48 and 72 hpi showed  
252 that rLS1 and rLS1-XII-2 produce similar infection expansion patterns in monolayers of  
253 DF-1 cells, while rLS1-XII-1 have a much more restricted spread in cells (Fig 2b).  
254 Accordingly, no clear cytopathic effect (CPE) or syncytia formation was observed in  
255 monolayers infected with rLS1-XII-1, whereas rLS1 and rLS1-XII-2 presented the typical  
256 CPE of NDV. This can explain the differences in growth curves between these strains.

257 **Table 2. Biological characteristics of NDV strains used in this study**

| Virus      | ICPI <sup>(a)</sup> | MDT <sup>(b)</sup> | EID <sub>50</sub> /ml | HA titer       | F cleavage site                      |
|------------|---------------------|--------------------|-----------------------|----------------|--------------------------------------|
| rLS1       | 0.1                 | 108 h              | 10 <sup>10.0</sup>    | 2 <sup>9</sup> | <sup>112</sup> GRQGRL <sup>117</sup> |
| rLS1-XII-1 | 0.0                 | >168 h             | 10 <sup>8.4</sup>     | 2 <sup>8</sup> | <sup>112</sup> GRQGRL <sup>117</sup> |
| rLS1-XII-2 | 0.0                 | 115 h              | 10 <sup>9.7</sup>     | 2 <sup>8</sup> | <sup>112</sup> GRQGRL <sup>117</sup> |
| PP2011     | 1.8                 | 56 h               | 10 <sup>9.2</sup>     | 2 <sup>9</sup> | <sup>112</sup> RRQKRF <sup>117</sup> |
| LaSota     | 0.4                 | 104 h              | 10 <sup>9.9</sup>     | 2 <sup>8</sup> | <sup>112</sup> GRQGRL <sup>117</sup> |

258 (a) Intracerebral pathogenicity index (ICPI) was evaluated in 1-day-old chickens. The maximum  
259 possible score for a virulent strain is 2.0, whereas the score of lentogenic strains is close to 0.0  
260 (b) Mean death time (MDT) was performed in 10-day-old embryonated chicken eggs. Values below 60  
261 h correspond to velogenic strains, values between 60 and 90 h correspond to mesogenic strains, and  
262 lentogenic strains have values above 90 h.

263

264 **Fig 2. Characterization of recombinant viruses.** (a) Multistep growth curves of rLS1,  
265 rLS1-XII-1 and rLS1-XII-2 in DF-1 cells. Cells were infected at a MOI of 0.05 and  
266 supernatants were collected in 12 hours intervals post-infection and tittered by TCID<sub>50</sub>/ml.  
267 Data was taken from three independent experiments. (b) In vitro infection patterns of the  
268 rNDVs. DF-1 cells were infected with a MOI of 0.01 for 1 hour and, then, covered with  
269 DMEM semisolid media containing 0.75 % methylcellulose. After 24, 48 and 72 h  
270 monolayers were washed and stained for NDV by immunofluorescence. All pictures were  
271 taken at 400X magnification.

272 The ICPI value for the parental rLS1 was 0.1, while for chimeric viruses rLS1-XII-1  
273 and rLS1-XII-2 were 0.0 (Table 2). MDT values were in agreement with these results,  
274 where these three strains were classified as lentogenic (MDT > 90 hours). Although, rLS1-  
275 XII-1 showed the largest MDT (>168 h). PP2011 challenge strain was classified as  
276 velogenic due to its ICPI of 1.8 [14] and a MDT of 56 h. These results showed that  
277 replacing completely or only the transmembrane and ectodomains of the F and HN genes of  
278 rLS1 by those of the PP2011 did not increase the virulence of the vaccine strains, as long as  
279 a dibasic cleavage site is present in the F protein.

## 280 **The rLS1-XII-1 virus failed to protect chickens against a** 281 **homologous challenge**

282 In a first experiment, chickens immunized with two doses of rLS1, rLS1-XII-1 or  
283 rLS1-XII-2 were challenged at the four week of age with PP2011 strain (genotype XII) via  
284 oculo-nasal route. Both rLS1 and rLS1-XII-2 were capable of fully protecting chickens  
285 against mortality (14/14), but rLS1-XII-1 protected only 71.3 % (10/14), while mock-  
286 vaccinated control group did not protect birds against mortality (Fig 3). None of the  
287 chickens in the rLS1 or rLS1-XII-2 groups showed any clinical signs, whereas in the rLS1-  
288 XII-1 group some chickens became sick at day 3 post challenge. Viral shedding assessed in  
289 oral and cloacal swaps were in agreement with mortality and clinical signs. At the peak of  
290 viral shedding (4 dpc), positive swabs in rLS1 (1/14 for oral swabs and 3/14 cloacal swabs)  
291 and rLS1-XII-2 (0/14 and 1/14 for oral and cloacal swabs, respectively) groups were less  
292 than in rLS1-XII-1 group (9/13 and 9/13 for oral and cloacal swabs, respectively)  
293 (supplementary S1 Table). At 2nd and 4th dpc, 90% (9/10) and 100% (5/5) of the chickens

294 in mock-vaccinated group were shedding virus (supplementary S1 Table).

295 **Fig 3. Survival rate after challenge with PP2011 (genotype XII) in chickens vaccinated**  
296 **with rNDVs.** Chickens were immunized at 1 and 14 days of age. The challenge was  
297 performed at day 28 with  $10^5$  LD<sub>50</sub> per chicken via oculo-nasal route.

298

299 **Vaccination with rLS1-XII-2 was able to reduce viral shedding**  
300 **against a genotype XII challenge better than a commercial**  
301 **LaSota vaccine.**

302 In order to further determine whether there are differences between rLS1-XII-2 and  
303 a commercial LaSota vaccine strain, 7-day-old SPF chickens were immunized with only  
304 one dose of either of these viruses. Four weeks later, oculo-nasal challenge with PP2011  
305 showed that both vaccine viruses protected 100% chickens against mortality, while PBS  
306 control group showed typical symptoms of velogenic NDV infection and had no survivors  
307 after day 5 post-challenge (Fig 4a). The shedding of challenged virus for immunized groups  
308 was assessed from oral and cloacal swabs at 2, 4 and 7 dpc. As shown in Table 3, the  
309 proportion of birds shedding challenge virus in mock-vaccinated group was the highest  
310 (between 80 and 100%). For LaSota vaccine group, 14-71 % of the swabs were positive,  
311 with a maximum peak at day 4 (7/14 for oral swabs and 10/14 for cloacal swabs). For rLS1-  
312 XII-2 vaccine group, only 0-29 % of oral and cloacal swabs were positive. In agreement  
313 with this, further quantitative analysis of positive swab samples showed that viral shedding  
314 in rLS1-XII-2 group tended to be significantly lower in oral and cloacal swabs compared to  
315 LaSota group (Fig 4b). Therefore, compared with the commercial LaSota vaccine, rLS1-

316 XII-2 is capable of reducing viral shedding after a challenge with a velogenic genotype XII  
317 strain.

318 **Fig 4. Comparison of the protection conferred by rLS1-XII-2 and LaSota strains**  
319 **against PP2011 (genotype XII) challenge.** Chickens were immunized once at 7 days of  
320 age and the challenge performed 28 dpv with  $10^5$  LD<sub>50</sub>/bird via oculo-nasal route. (a)  
321 Survival rate of vaccinated chickens showed no mortality in 10 days following the  
322 challenge. (b) Viral shedding from oral and cloacal swabs from chickens that were positive  
323 to challenge virus isolation. (c and d) Genotypes XII- and II-specific neutralizing antibodies  
324 in vaccinated chickens at 14 and 28 dpv. \* $p < 0.05$  and \*\*\* $p < 0.001$ .

325

326 **Table 3. Frequency of isolation of challenge virus in vaccination groups.**

| Group      | Number of viral shedding chickens (positive/total) |         |       |         |                   |         |
|------------|----------------------------------------------------|---------|-------|---------|-------------------|---------|
|            | 2 dpc. <sup>(a)</sup>                              |         | 4 dpc |         | 7 dpc             |         |
|            | Oral                                               | Cloacal | Oral  | Cloacal | Oral              | Cloacal |
| rLS1-XII-2 | 0/14                                               | 2/14    | 2/14  | 4/14    | 0/14              | 2/14    |
| LaSota     | 3/14                                               | 5/14    | 7/14  | 10/14   | 2/14              | 6/14    |
| PBS        | 8/10                                               | 10/10   | 5/5   | 5/5     | NS <sup>(b)</sup> | NS      |

327 (a) dpc = days post challenge

328 (b) NS = no survivors

329

330 Genotype XII-specific serum neutralization titers taken at 14 or 28 dpv showed no  
331 difference between rLS1-XII-2 and LaSota strains (Fig 4c). However, the same samples  
332 tested for genotype II-specific neutralizing antibodies showed that LaSota group was  
333 significantly increased at 28 dpv ( $p = 0.031$ ) and borderline significant at 14 dpv ( $p =$   
334  $0.053$ ) (Fig 4d).

## 335 Discussion



336           Genotype XII is present in South America and is the prevalent circulating genotype  
337 in Peru [10,13,15]. In our country, current vaccination strategies have shown to be not  
338 sufficient to prevent outbreaks of the disease. This can be partially explained by antigenic  
339 differences between circulating and vaccine strains (see Table 1). Hence, improvements of  
340 vaccines and vaccination strategies are a priority. In this context, we decided to develop a  
341 genotype XII-matched, live attenuated vaccine candidate. First, we generated two chimeric  
342 NDVs, rLS1-XII-1 and -2. These viruses contain the F and HN proteins of the PP2011  
343 strain (genotype XII) and the backbone of the parental rLS1 virus. For rLS1-XII-1, the  
344 complete ORFs of the F and HN proteins were replaced with those of the PP2011 strain,  
345 while, for rLS1-XII-2, only the ecto- and transmembrane domains of the F and HN proteins  
346 were replaced with those of the PP2011. Second, we tested the protection capacity of both  
347 viruses and the parental virus, obtaining that rLS1-XII-1 was not capable to fully protect  
348 SPF chickens against a genotype XII challenge. Finally, rLS1-XII-2 and a commercial  
349 LaSota vaccine were compared. Both strains fully protected SPF chickens, nonetheless,  
350 rLS1-XII-2 reduced significantly viral shedding. This places rLS1-XII-2 as a promising  
351 NDV vaccine candidate that would be suitable to better protect chickens against circulating  
352 genotype XII strains in Peru.

353           The presence of non-homologous cytoplasmic tails of F and HN proteins in  
354 genotype-matched NDV vaccine strains can produce an enormous impact on viral  
355 replication and, therefore, in protection. Genetically, the only difference between rLS1-XII-  
356 1 and -2 is the presence of homologous cytoplasmic tails in the latter. Nonetheless, rLS1-  
357 XII-1 has severely reduced the capacity of the virus to replicate (Fig 2). Other authors have  
358 developed genotype-matched NDV vaccines by replacing the complete ORFs of the F and

359 HN protein genes with those of the strain of interest in LaSota backbone [21–24], as we did  
360 for rLS1-XII-1. In those studies, they found either greater [21,22] or similar [23,24]  
361 protection against homologous challenge compared to the parental recombinant LaSota.  
362 Although in those studies only genotypes VII and XI have been evaluated. Conversely, in  
363 this study the same strategy (rLS1-XII-1) resulted in a poorly replicating virus that was not  
364 able to prevent mortality, even with two vaccination doses, after a genotype XII challenge  
365 (see Fig 3). This was reverted when cytoplasmic tails of the F and HN proteins were  
366 restored to those original rLS1. The rLS1-XII-2 virus was able to prevent mortality as well  
367 as to reduce viral shedding better than a commercial LaSota vaccine (see Figs 4a and 4b  
368 and Table 3). Thus, one question arises, why previous studies have found at least the same  
369 (if not better) protection when complete F and HN ORFs were swapped with those of other  
370 genotypes? The most likely explanation is that F and/or HN cytoplasmic tails of the  
371 genotype XII strain PP2011 have a specific amino-acid(s) difference(s) that is not  
372 completely compatible with rLS1 backbone, affecting viral assembly or replication.  
373 Previously reported chimeric viruses do not have this specific amino-acid difference. The  
374 final consequence of this is a poorly replicating virus that cannot efficiently stimulate  
375 chicken immune system. This is reinforced by the fact that viruses with swapped  
376 cytoplasmic tails between NDV and an *Avian Avulavirus 2* cannot be recovered [30], or  
377 that disease severity can be negatively affected by the interaction between F and HN  
378 proteins with a heterologous M protein [31].

379           It has been shown that an efficient assembly and replication of the virus can be  
380 affected by removing key amino acids in the cytoplasmic tails of either the F or HN  
381 proteins [32,33]. Regarding the F protein, deletion of the last 6 amino-acids (positions 548

382 through 553), but not the last 4 amino-acids, of the cytoplasmic tail at the C-terminal  
383 region, impairs viral recovery [33], showing the importance of positions 548 and 549 for  
384 virus replication. Sequence analysis of the F protein of strains previously used to generate  
385 genotype-matched vaccines revealed that only PP2011 has a mutation in one of these  
386 positions with respect to LaSota (Fig 5a). This mutation (Ala549Thr) changes the charge of  
387 the amino acid from a hydrophobic to a polar amino-acid. Regarding the N-terminal  
388 cytoplasmic tail of the HN protein, positions 6 and 7 in the amino-acid sequence seem to be  
389 essential for viral replication [32]. The PP2011 strain has an amino-acid change in position  
390 6 (Ser6Asp) which has a different nature to the one in rLS1, changing from an uncharged  
391 polar to a negative-charged amino-acid. While the other strains have different amino-acids  
392 at this position (Ser6Asn or Ser6Thr), these do not change the polar nature of this amino  
393 acid position (see Fig 5b). Gln7Lys mutation in position 7 is also unique for PP2011,  
394 although the nature of this change (from uncharged polar to basic) is the same to the ones  
395 present in the other analyzed strains (Gln7Arg). Despite that, the above described amino-  
396 acid changes are the most likely to cause the phenotype discrepancies between rLS1-XII-1  
397 and -2, it is unclear which mutation(s) is responsible for the observed phenotype. Besides,  
398 we cannot rule out the possibility that the other mutation(s) in the cytoplasmic tails of either  
399 F or HN proteins may play a role in virus fitness. Further studies should determine the  
400 individual effect of each of these mutations and reveal key amino-acid positions for viral  
401 assembly and replication.

402 **Fig 5. Amino-acid sequence alignment of F (a) and HN (b) cytoplasmic tails from**  
403 **NDVs used to generate chimeric viruses.** F and HN sequences from strains Ban/010  
404 (Acc. N° HQ697254) [22], NL/93 (Acc. N° JN986837) [23], KBNP-4152 (Acc. N°  
405 DQ839397) [21] and MG\_725 (Acc. N° HQ266602) [24] were previously used to generate

406 chimeric NDVs in LaSota (Acc. N° AF077761) backbone. PP2011 (Acc. N° KR732614)  
407 [14] F and HN cytoplasmic tail sequences were used in this study to generate rLS1-XII-1  
408 strain in the rLS1 backbone. Amino-acid sequences of F and HN cytoplasmic tails are  
409 exactly the same for LaSota and rLS1.

410

411           Increased serum neutralizing antibodies are not a requirement for reduction in viral  
412 shedding. In our second experiment, we showed that compared with LaSota, rLS1-XII-2  
413 vaccine reduced viral shedding in both the number of shedding birds and the quantity of  
414 secreted virus per positive chicken (see Table 2 and Fig 4b). Nevertheless, we did not find  
415 increased genotype XII-specific neutralizing antibody titers in rLS1-XII-2 (Fig 4c). These  
416 results seem contradictory compared with previous experiments [18,19,22,25,27], but to  
417 explain this apparent discrepancy, we suggest two possibilities: 1) Local immunity was  
418 increased in respiratory and gut tracts in chickens vaccinated with rLS1-XII-2 compared to  
419 those vaccinated with LaSota. Given that rLS1-XII-2 has the surface proteins of the  
420 genotype XII, it could have a tropism towards respiratory and gut tracts [15], similar to the  
421 challenge strain, while LaSota replicates almost exclusively in the respiratory tract [34].  
422 This can elicit a greater local and more specific response, evidenced by, for example, the  
423 increased number of genotype XII-specific resident memory T and B cells or the elevated  
424 levels of specific-IgA in mucosal tissues, but not in serum. 2) Cellular immune response  
425 may help to clear the infection rapidly, avoiding or reducing viral shedding. Chickens  
426 vaccinated with rLS1-XII-2 are exposed to more similar epitopes of the PP2011 challenge  
427 strain than chickens vaccinated with LaSota vaccine. These epitopes can be presented to  
428 CD4<sup>+</sup> or CD8<sup>+</sup> T cells via major histocompatibility complex class-I (MHC-I) and class-II  
429 (MHC-II) and start to clear the infection. Nonetheless, neither of these mechanisms were

430 assessed in this study and we cannot rule out other possible explanations.

431 In conclusion, we have developed a recombinant NDV vaccine candidate capable of  
432 fully protecting chickens and reduce viral shedding against a genotype XII homologous  
433 challenge. Furthermore, we have showed the importance of cytoplasmic tails in replication  
434 to generate competent vaccine viruses. Therefore, the balance between replication and  
435 antigenicity should be taken into account for developing efficient genotype-matched  
436 vaccines.

437

## 438 **Acknowledgements**

439 The authors would like to thank Edison Huaccachi, James Quispe and Julia Garayar for  
440 their excellent technical assistance.

## 441 **Funding**

442 This study was partially funded by the Peruvian Science and Technology Program  
443 (FINCyT) contract n° ITAI-2-P-050-009-15.

## 444 **Author's contributions**

445 RI-L, AC, MF-D and VNV contributed to conception and designed the research. RI-L, AC  
446 and KC acquired the data of the study. RI-L analyzed the data, and all authors interpreted  
447 them. RI-L and VNV drafted the paper, and all authors revised it critically, read and  
448 approved the final manuscript.

## 449 **Competing interests**

450 MF-D is the Founder and CEO of FARVET S.A.C., the company that owns the rights of  
451 the chimeric viruses (rLS1-XII-1 and rLS1-XII-2) reported in this study. All other authors  
452 declare having no competing interests (RI-L, AC, KC and VNV).

## 453 **References**

- 454 1. Hines NL, Miller CL. Avian paramyxovirus serotype-1: a review of disease  
455 distribution, clinical symptoms, and laboratory diagnostics. *Vet. Med. Int.* **2012**, 2012:  
456 708216.
- 457 2. Mayo MA. A summary of taxonomic changes recently approved by ICTV. *Arch. Virol.*  
458 **2002**, vol. 147, no. 8, pp. 1655–1663.
- 459 3. Peeters BP, Gruijthuijsen YK, de Leeuw OS, Gielkens AL. Genome replication of  
460 Newcastle disease virus: involvement of the rule-of-six. *Arch. Virol.* **2000**, 145, 9,  
461 1829–1845.
- 462 4. Zhao H, Peeters BPH. Recombinant Newcastle disease virus as a viral vector: effect of  
463 genomic location of foreign gene on gene expression and virus replication. *J. Gen.*  
464 *Virol.* **2003**, 84(4), 781–788.
- 465 5. Pantua HD, McGinnes LW, Peeples ME, Morrison TG. Requirements for the assembly  
466 and release of Newcastle disease virus-like particles. *J. Virol.* **2006**, 80(22), 11062–  
467 11073.
- 468 6. Dolganiuc V, McGinnes L, Luna EJ, Morrison TG. Role of the cytoplasmic domain of  
469 the Newcastle disease virus fusion protein in association with lipid rafts. *J. Virol.*  
470 **2003**, 77(24), 12968–12979.
- 471 7. Liu YC, Grusovin J, Adams TE. Electrostatic Interactions between Hendra Virus  
472 Matrix Proteins Are Required for Efficient Virus-Like-Particle Assembly. *J. Virol.*  
473 **2018**, 92(13), 01.
- 474 8. Peeters BP, de Leeuw OS, Koch G, Gielkens AL. Rescue of Newcastle disease virus  
475 from cloned cDNA: evidence that cleavability of the fusion protein is a major

- 476 determinant for virulence. *J. Virol.* **1999**, 73(6), 5001–5009.
- 477 9. Ogasawara T, Gotoh B, Suzuki H, Asaka J, Shimokata K, Rott R, Nagai Y. Expression  
478 of factor X and its significance for the determination of paramyxovirus tropism in the  
479 chick embryo. *EMBO J.* **1992**, 11(2), 467–472.
- 480 10. Diel DG, da Silva LHA, Liu H, Wang Z, Miller PJ, Afonso CL. Genetic diversity of  
481 avian paramyxovirus type 1: proposal for a unified nomenclature and classification  
482 system of Newcastle disease virus genotypes. *Infect. Genet. Evol.* **2012**, 12(8), 1770–  
483 1779.
- 484 11. Snoeck CJ, Owoade AA, Couacy-Hymann E, Alkali BR, Okwen MP, Adeyanju AT,  
485 Komoyo GF, Nakouné E, Le Faou A, Muller CP. High genetic diversity of Newcastle  
486 disease virus in poultry in West and Central Africa: cocirculation of genotype XIV and  
487 newly defined genotypes XVII and XVIII. *J. Clin. Microbiol.* **2013**, 51(7), 2250–2260.
- 488 12. Le XTK, Doan HTT, Le TH. Molecular analysis of Newcastle disease virus isolates  
489 reveals a novel XIId subgenotype in Vietnam. *Arch. Virol.* **2018**, 163(11), 3125–3130.
- 490 13. Chumbe A, Izquierdo-Lara R, Tataje L, Gonzalez R, Cribillero G, González AE,  
491 Fernández-Díaz M, Icochea E. Pathotyping and Phylogenetic Characterization of  
492 Newcastle Disease Viruses Isolated in Peru: Defining Two Novel Subgenotypes within  
493 Genotype XII. *Avian Dis.* **2017**, 61(1), 16–24.
- 494 14. Chumbe A, Izquierdo-Lara R, Tataje-Lavanda L, Figueroa A, Segovia K, Gonzalez R,  
495 Cribillero G, Montalvan A, Fernández-Díaz M, Icochea E. Characterization and  
496 Sequencing of a Genotype XII Newcastle Disease Virus Isolated from a Peacock (*Pavo*  
497 *cristatus*) in Peru. *Genome Announc.* **2015**, 3(4), e00792-15.
- 498 15. Diel DG, Susta L, Cardenas Garcia S, Killian ML, Brown CC, Miller PJ, Afonso CL.  
499 Complete genome and clinicopathological characterization of a virulent Newcastle  
500 disease virus isolate from South America. *J. Clin. Microbiol.* **2012**, 50(2), 378–387.
- 501 16. Liu H, Lv Y, Afonso CL, Ge S, Zheng D, Zhao Y, Wang Z. Complete Genome  
502 Sequences of New Emerging Newcastle Disease Virus Strains Isolated from China,”  
503 *Genome Announc.* **2013**, 1(1), e00129-12.
- 504 17. OIE. World Animal Health Information Database (WAHID) Interface. Available  
505 online: [https://www.oie.int/wahis\\_2/public/wahid.php/Diseaseinformation/statusdetail](https://www.oie.int/wahis_2/public/wahid.php/Diseaseinformation/statusdetail).  
506 (Accessed on 20 October 2018).

- 507 18. Miller PJ, King DJ, Afonso CL, Suarez DL. Antigenic differences among Newcastle  
508 disease virus strains of different genotypes used in vaccine formulation affect viral  
509 shedding after a virulent challenge. *Vaccine*. **2007**, 25(41), 7238–7246.
- 510 19. Miller PJ, Estevez C, Yu Q, Suarez DL, King DJ. Comparison of viral shedding  
511 following vaccination with inactivated and live Newcastle disease vaccines formulated  
512 with wild-type and recombinant viruses. *Avian Dis*. **2009**, 1, 39–49.
- 513 20. Wajid A, Basharat A, Bibi T, Rehmani SF. Comparison of protection and viral  
514 shedding following vaccination with Newcastle disease virus strains of different  
515 genotypes used in vaccine formulation. *Trop. Anim. Health Prod*. **2018**, 50(7), 1645–  
516 1651.
- 517 21. Cho SH, Kwon HJ, Kim TE, Kim JH, Yoo HS, Park MH, Park YH, Kim SJ.  
518 Characterization of a recombinant Newcastle disease virus vaccine strain. *Clin.*  
519 *Vaccine Immunol*. **2008**, 15(10), 1572–1579.
- 520 22. Kim S-H, Wanasen N, Paldurai A, Xiao S, Collins PL, Samal SK. Newcastle disease  
521 virus fusion protein is the major contributor to protective immunity of genotype-  
522 matched vaccine. *PloS One*. **2013**, 8(8), e74022.
- 523 23. Dortmans JC, Peeters BP, Koch G. Newcastle disease virus outbreaks: vaccine  
524 mismatch or inadequate application? *Vet. Microbiol*. **2012**. 160(1–2), 17–22.
- 525 24. Liu H, de Almeida RS, Gil P, Majó N, Nofrarias M, Briand FX, Jestin V, Albina E.  
526 Can genotype mismatch really affect the level of protection conferred by Newcastle  
527 disease vaccines against heterologous virulent strains? *Vaccine*. **2018**, 36(27), 3917–  
528 3925.
- 529 25. Hu Z, Hu S, Meng C, Wang X, Zhu J, Liu X. Generation of a genotype VII Newcastle  
530 disease virus vaccine candidate with high yield in embryonated chicken eggs. *Avian*  
531 *Dis*. **2011**, 55(3), 391–397.
- 532 26. Xiao S, Nayak B, Samuel A, Paldurai A, Kanabagattebasavarajappa M, Prajitno TY,  
533 Bharoto EE, Collins PL, Samal SK. Generation by Reverse Genetics of an Effective,  
534 Stable, Live-Attenuated Newcastle Disease Virus Vaccine Based on a Currently  
535 Circulating, Highly Virulent Indonesian Strain. *PLOS ONE*. **2012**, 12, e52751.
- 536 27. Kim SH, Chen Z, Yoshida A, Paldurai A, Xiao S, Samal SK. Evaluation of fusion  
537 protein cleavage site sequences of Newcastle disease virus in genotype matched



- 538 vaccines. *PLOS ONE*. **2017**, 12(3), e0173965.
- 539 28. Chumbe A, Izquierdo-Lara R, Calderón K, Fernández-Díaz M, Vakharia VN.  
540 Development of a novel Newcastle disease virus (NDV) neutralization test based on  
541 recombinant NDV expressing enhanced green fluorescent protein. *Viol. J.* **2017**,  
542 14(1), 232.
- 543 29. World Organization for Animal Health, Terrestrial Manual. Paris, **2012**.
- 544 30. Kim SH, Subbiah M, Samuel AS, Collins PL, Samal SK. Roles of the fusion and  
545 hemagglutinin-neuraminidase proteins in replication, tropism, and pathogenicity of  
546 avian paramyxoviruses. *J. Virol.* **2011**, 85(17), 8582–8596.
- 547 31. Kai Y, Hu Z, Xu H, Hu S, Zhu J, Hu J, Wang X, Liu X, Liu X. The M, F and HN  
548 genes of genotype VIIId Newcastle disease virus are associated with the severe  
549 pathological changes in the spleen of chickens. *Viol. J.* **2015**, 12:133.
- 550 32. Kim SH, Yan Y, Samal SK. Role of the cytoplasmic tail amino acid sequences of  
551 Newcastle disease virus hemagglutinin-neuraminidase protein in virion incorporation,  
552 cell fusion, and pathogenicity. *J. Virol.* **2009**, 83(19), 10250–10255.
- 553 33. Samal S, Khattar SK, Paldurai A, Palaniyandi S, Zhu X, Collins PL, Samal SK.  
554 Mutations in the cytoplasmic domain of the Newcastle disease virus fusion protein  
555 confer hyperfusogenic phenotypes modulating viral replication and pathogenicity. *J.*  
556 *Viol.* **2013**, 87(18), 10083–10093.
- 557 34. Perozo F, Villegas P, Dolz R, Afonso CL, Purvis LB. The VG/GA strain of Newcastle  
558 disease virus: mucosal immunity, protection against lethal challenge and molecular  
559 analysis. *Avian Pathol.* **2008**, 37(3), 237–245.

560

## 561 **Supporting information**

562 **S1 Table. Frequency of isolation of challenge virus in vaccinated groups of the first**  
563 **experiment**

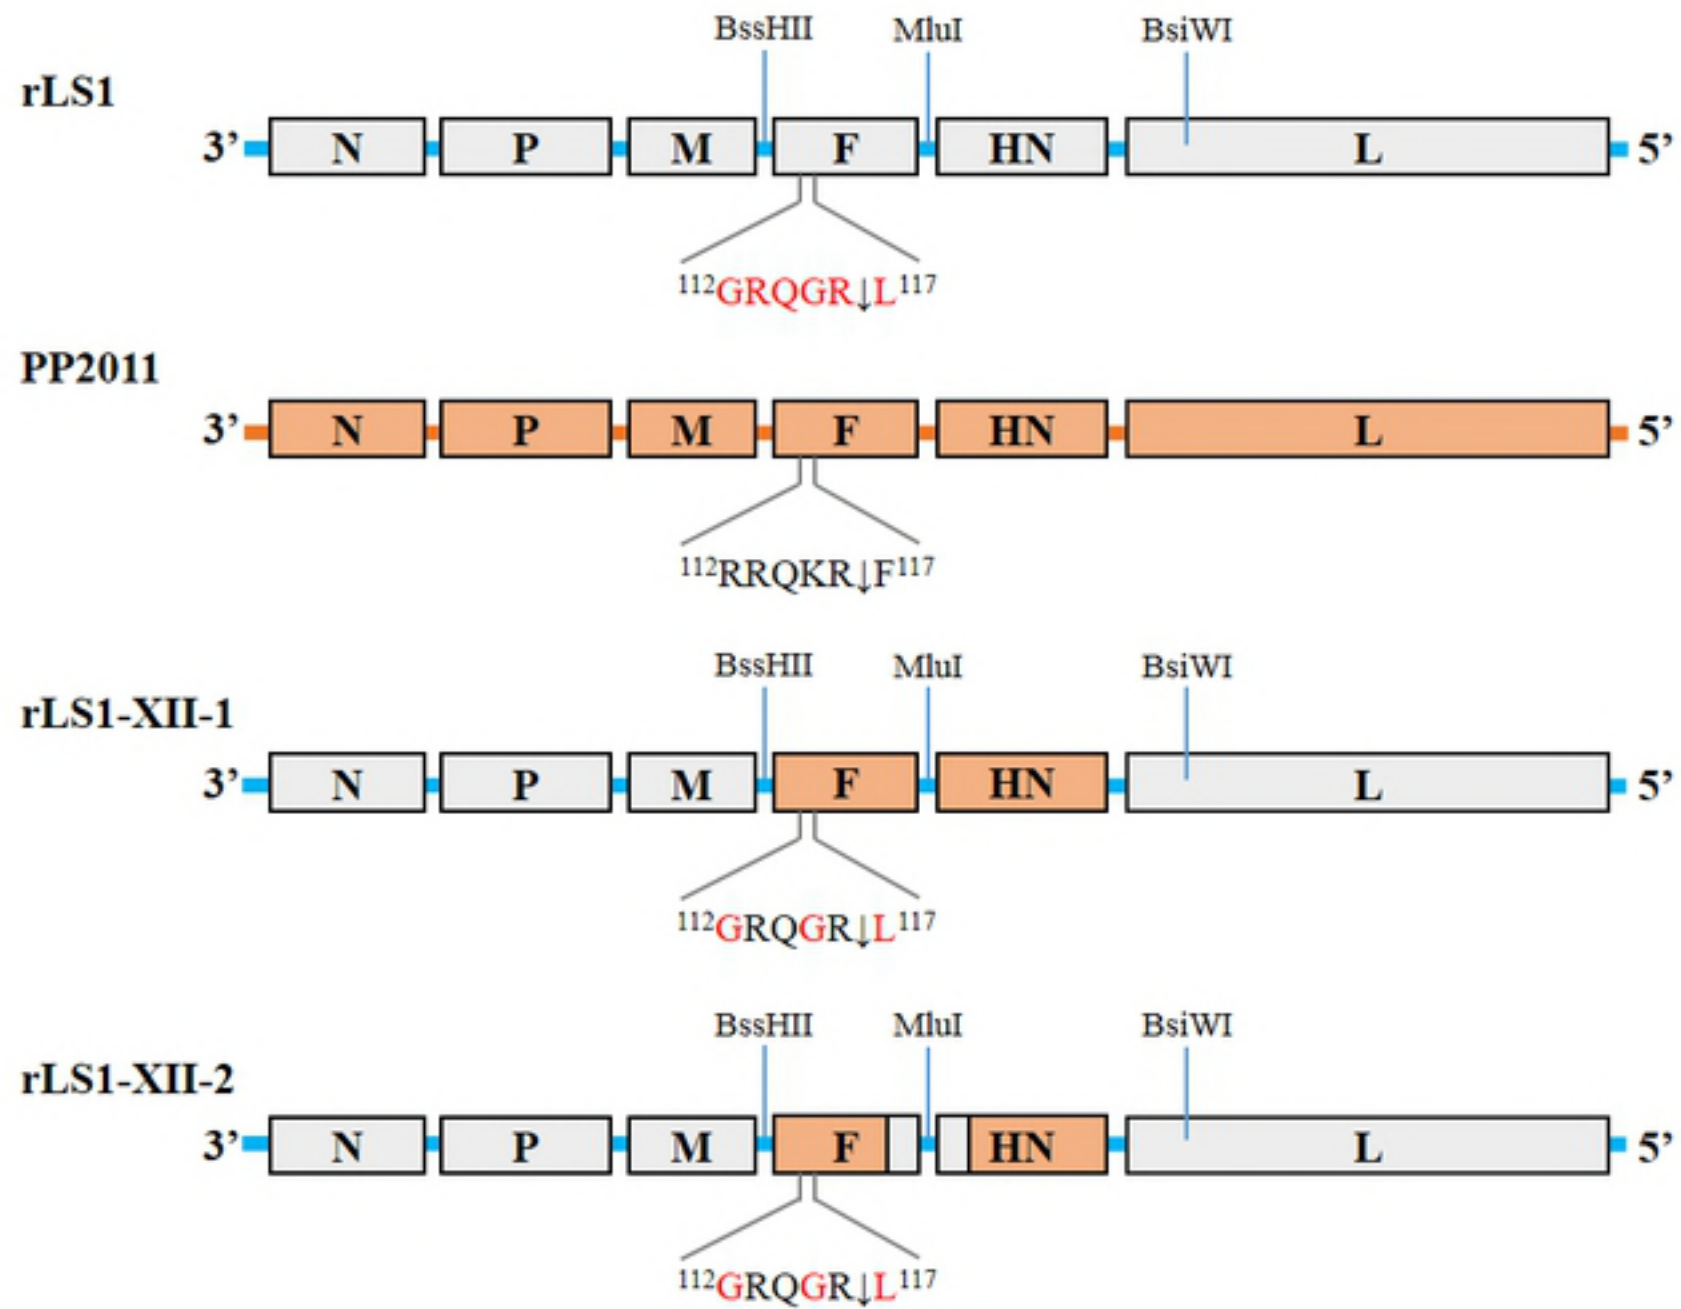

Fig 1

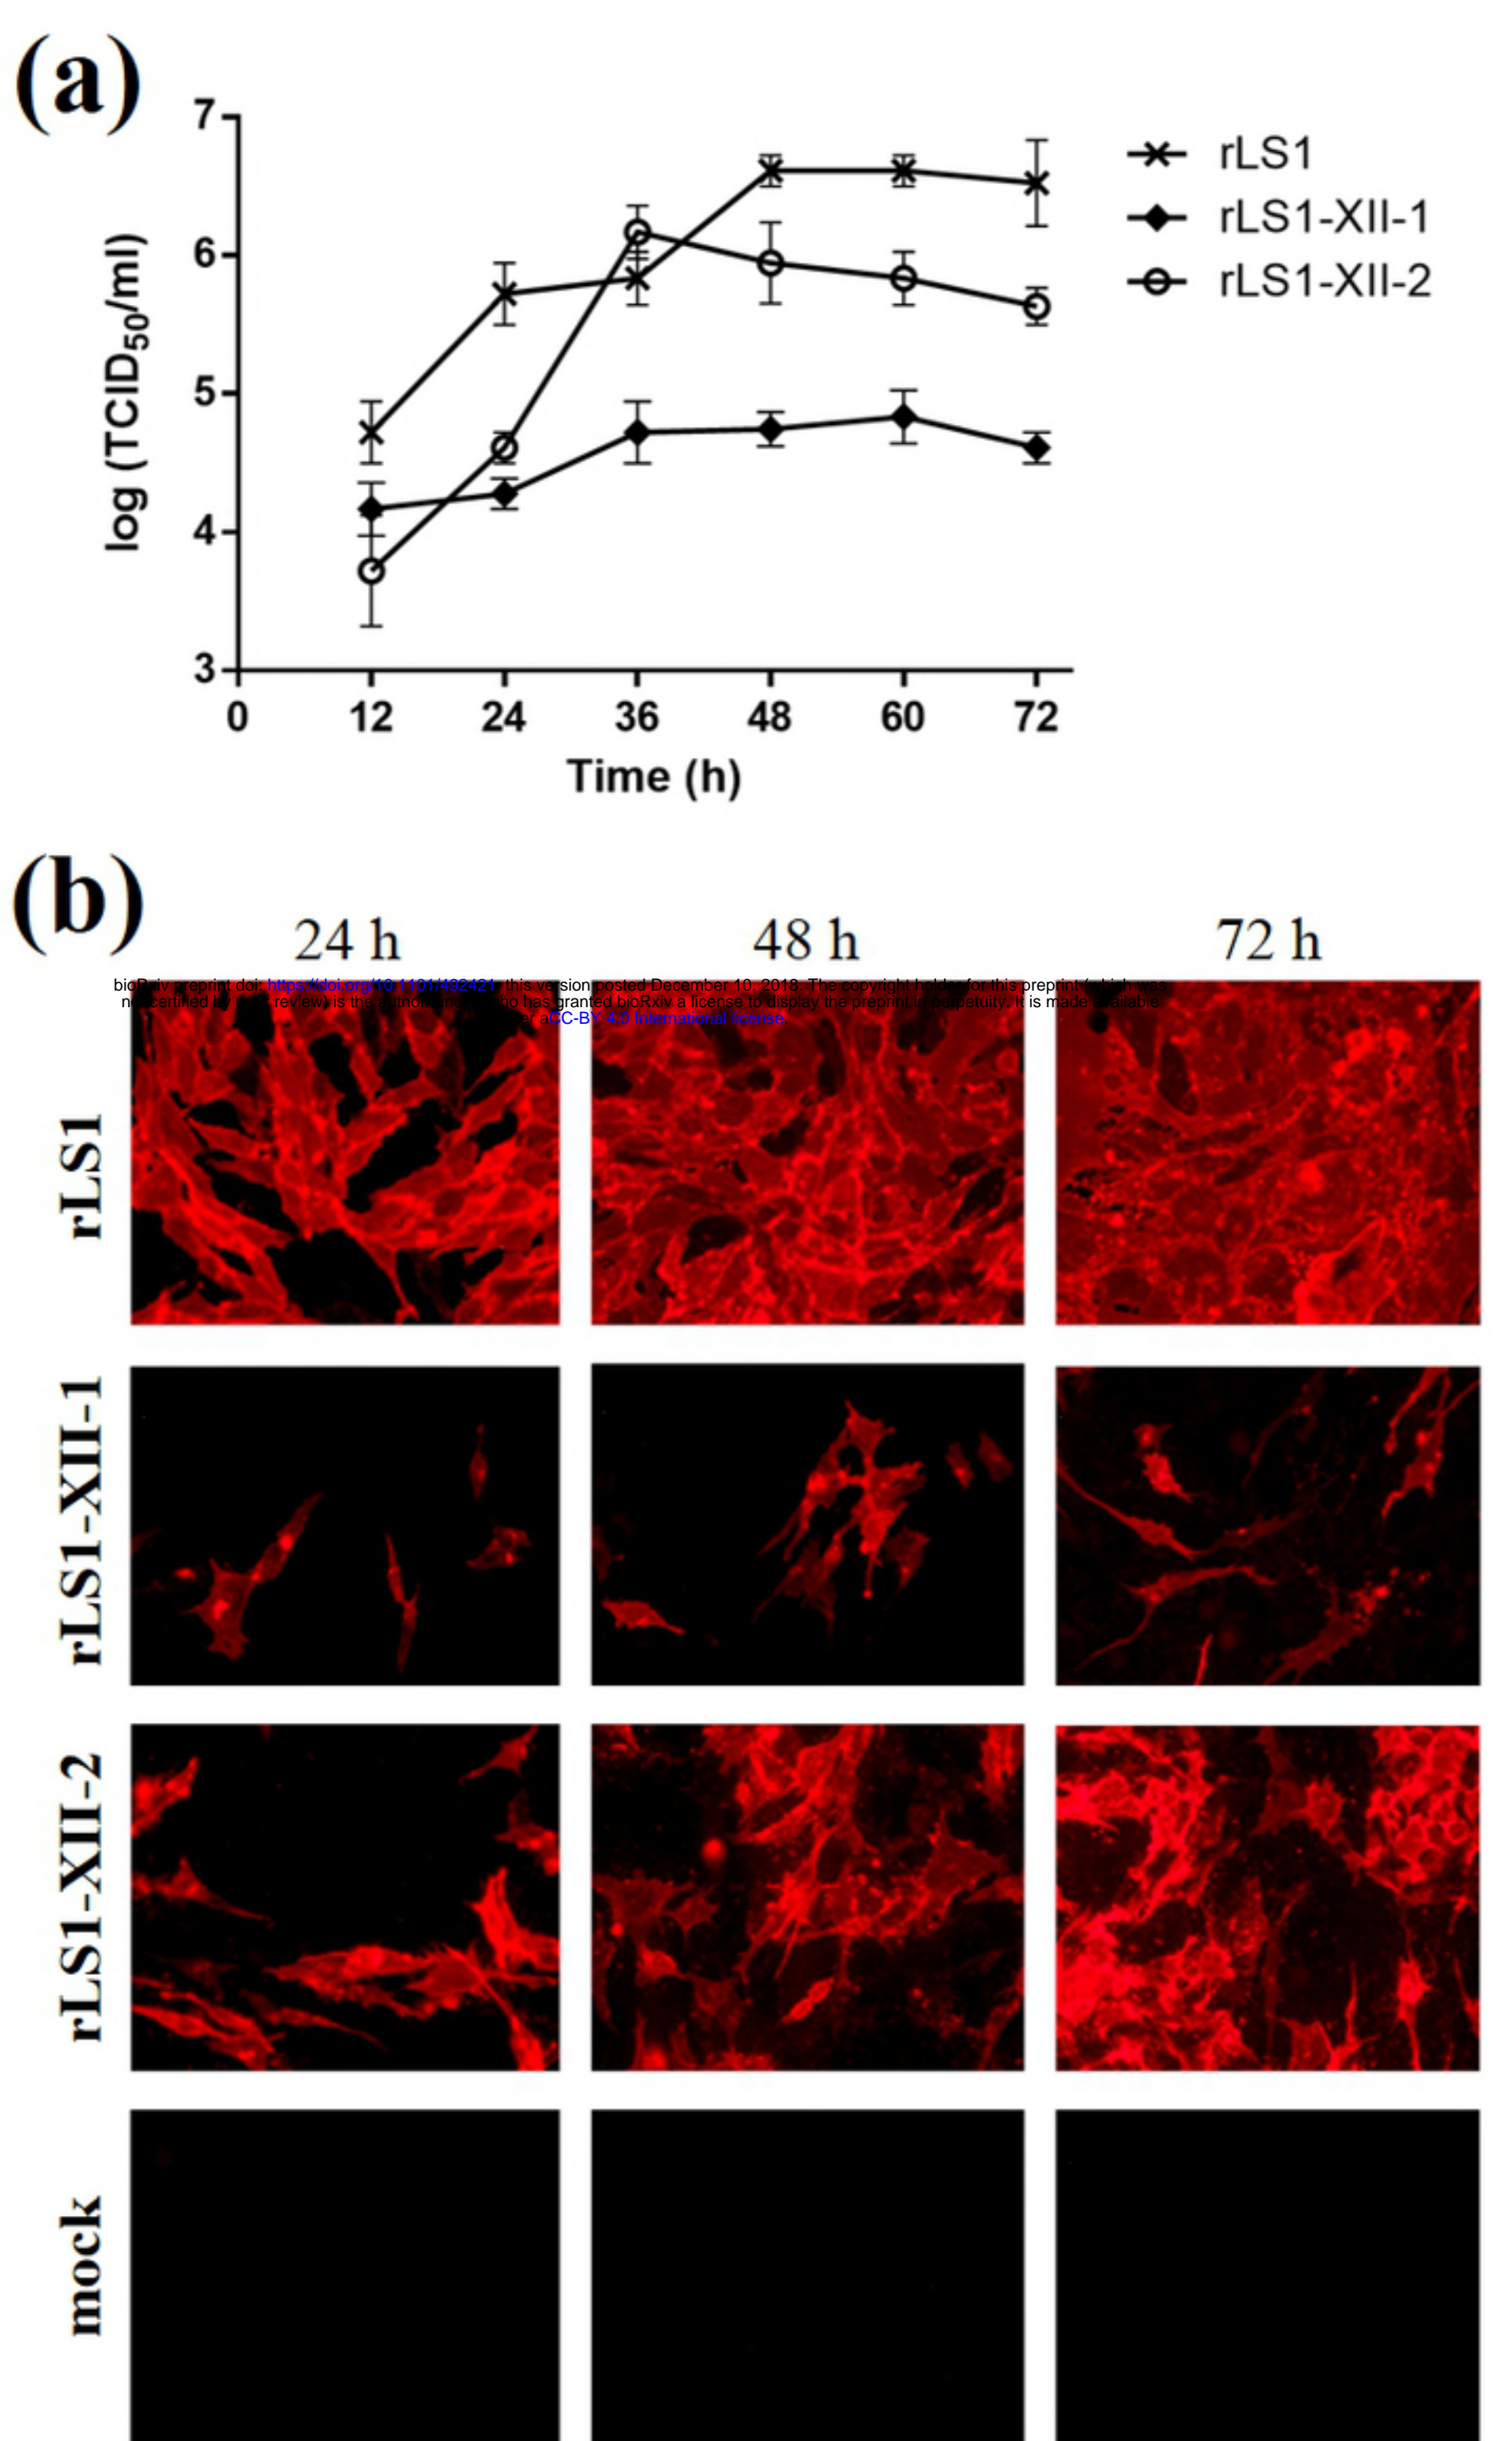

Fig 2

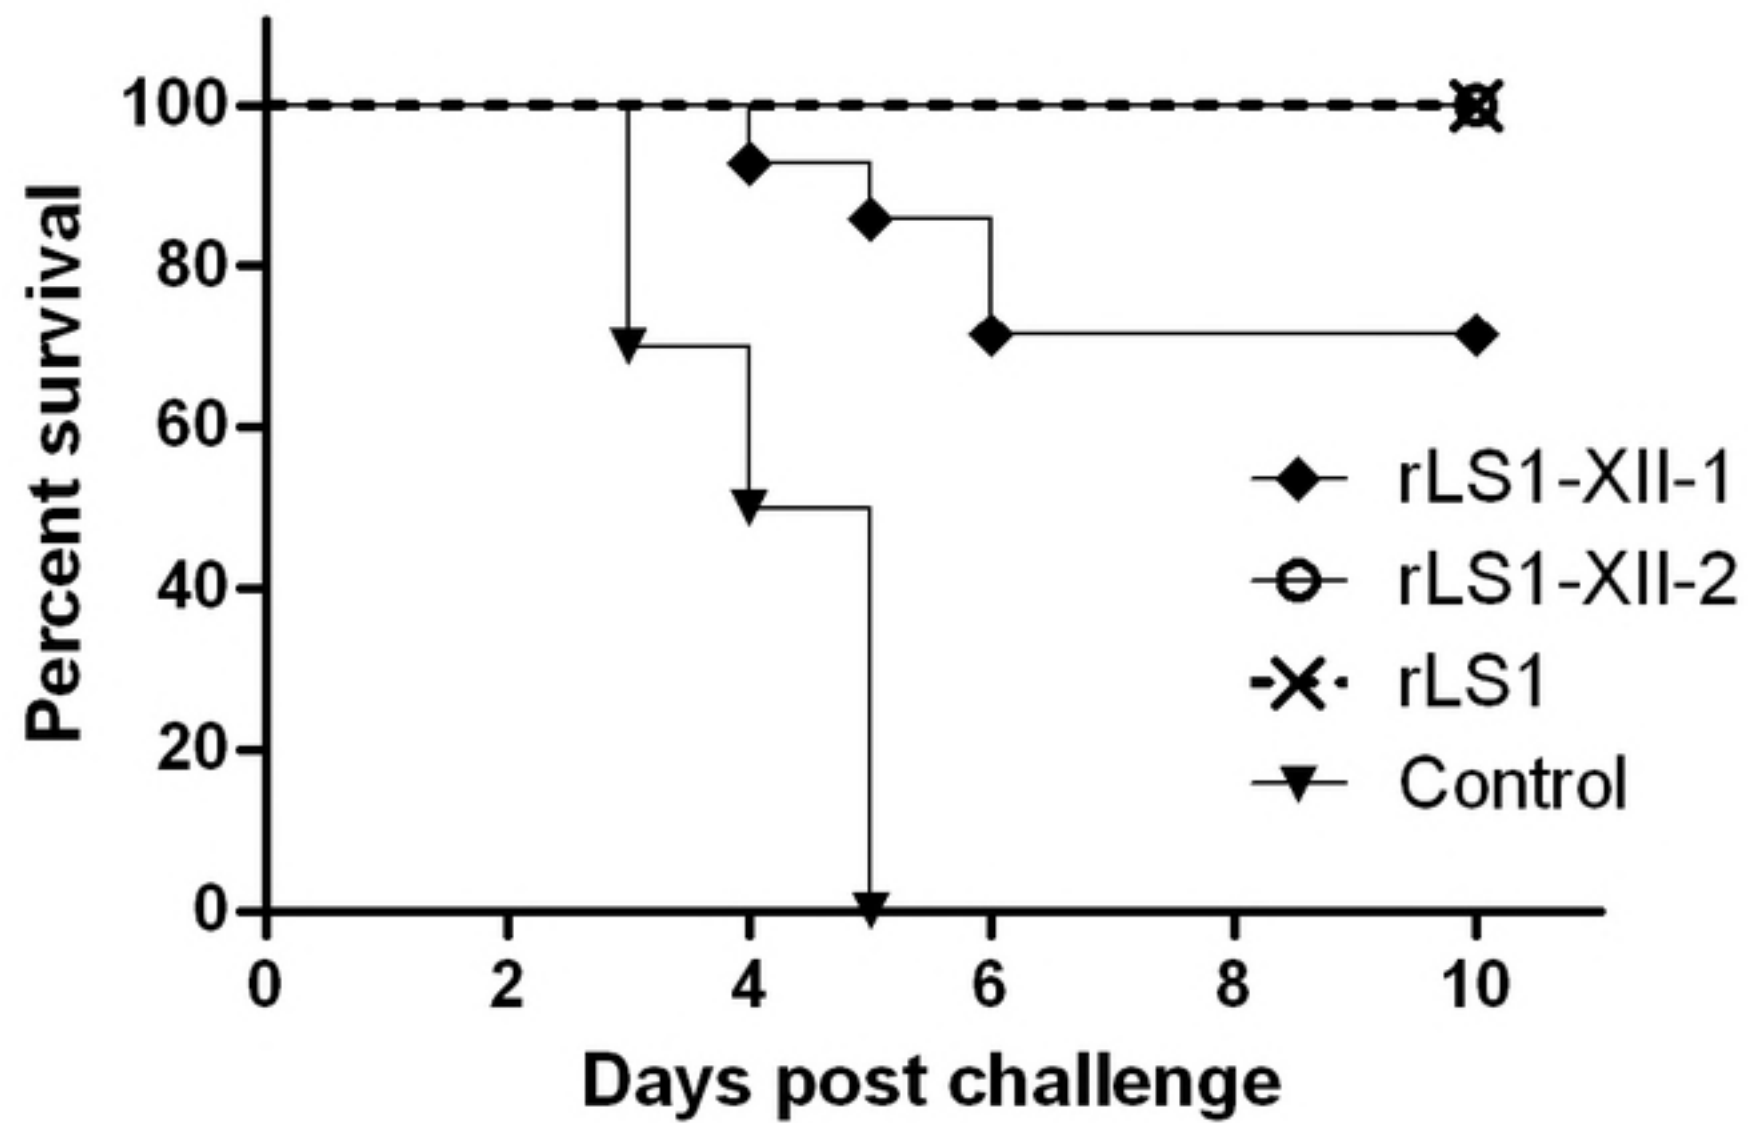

Fig 3

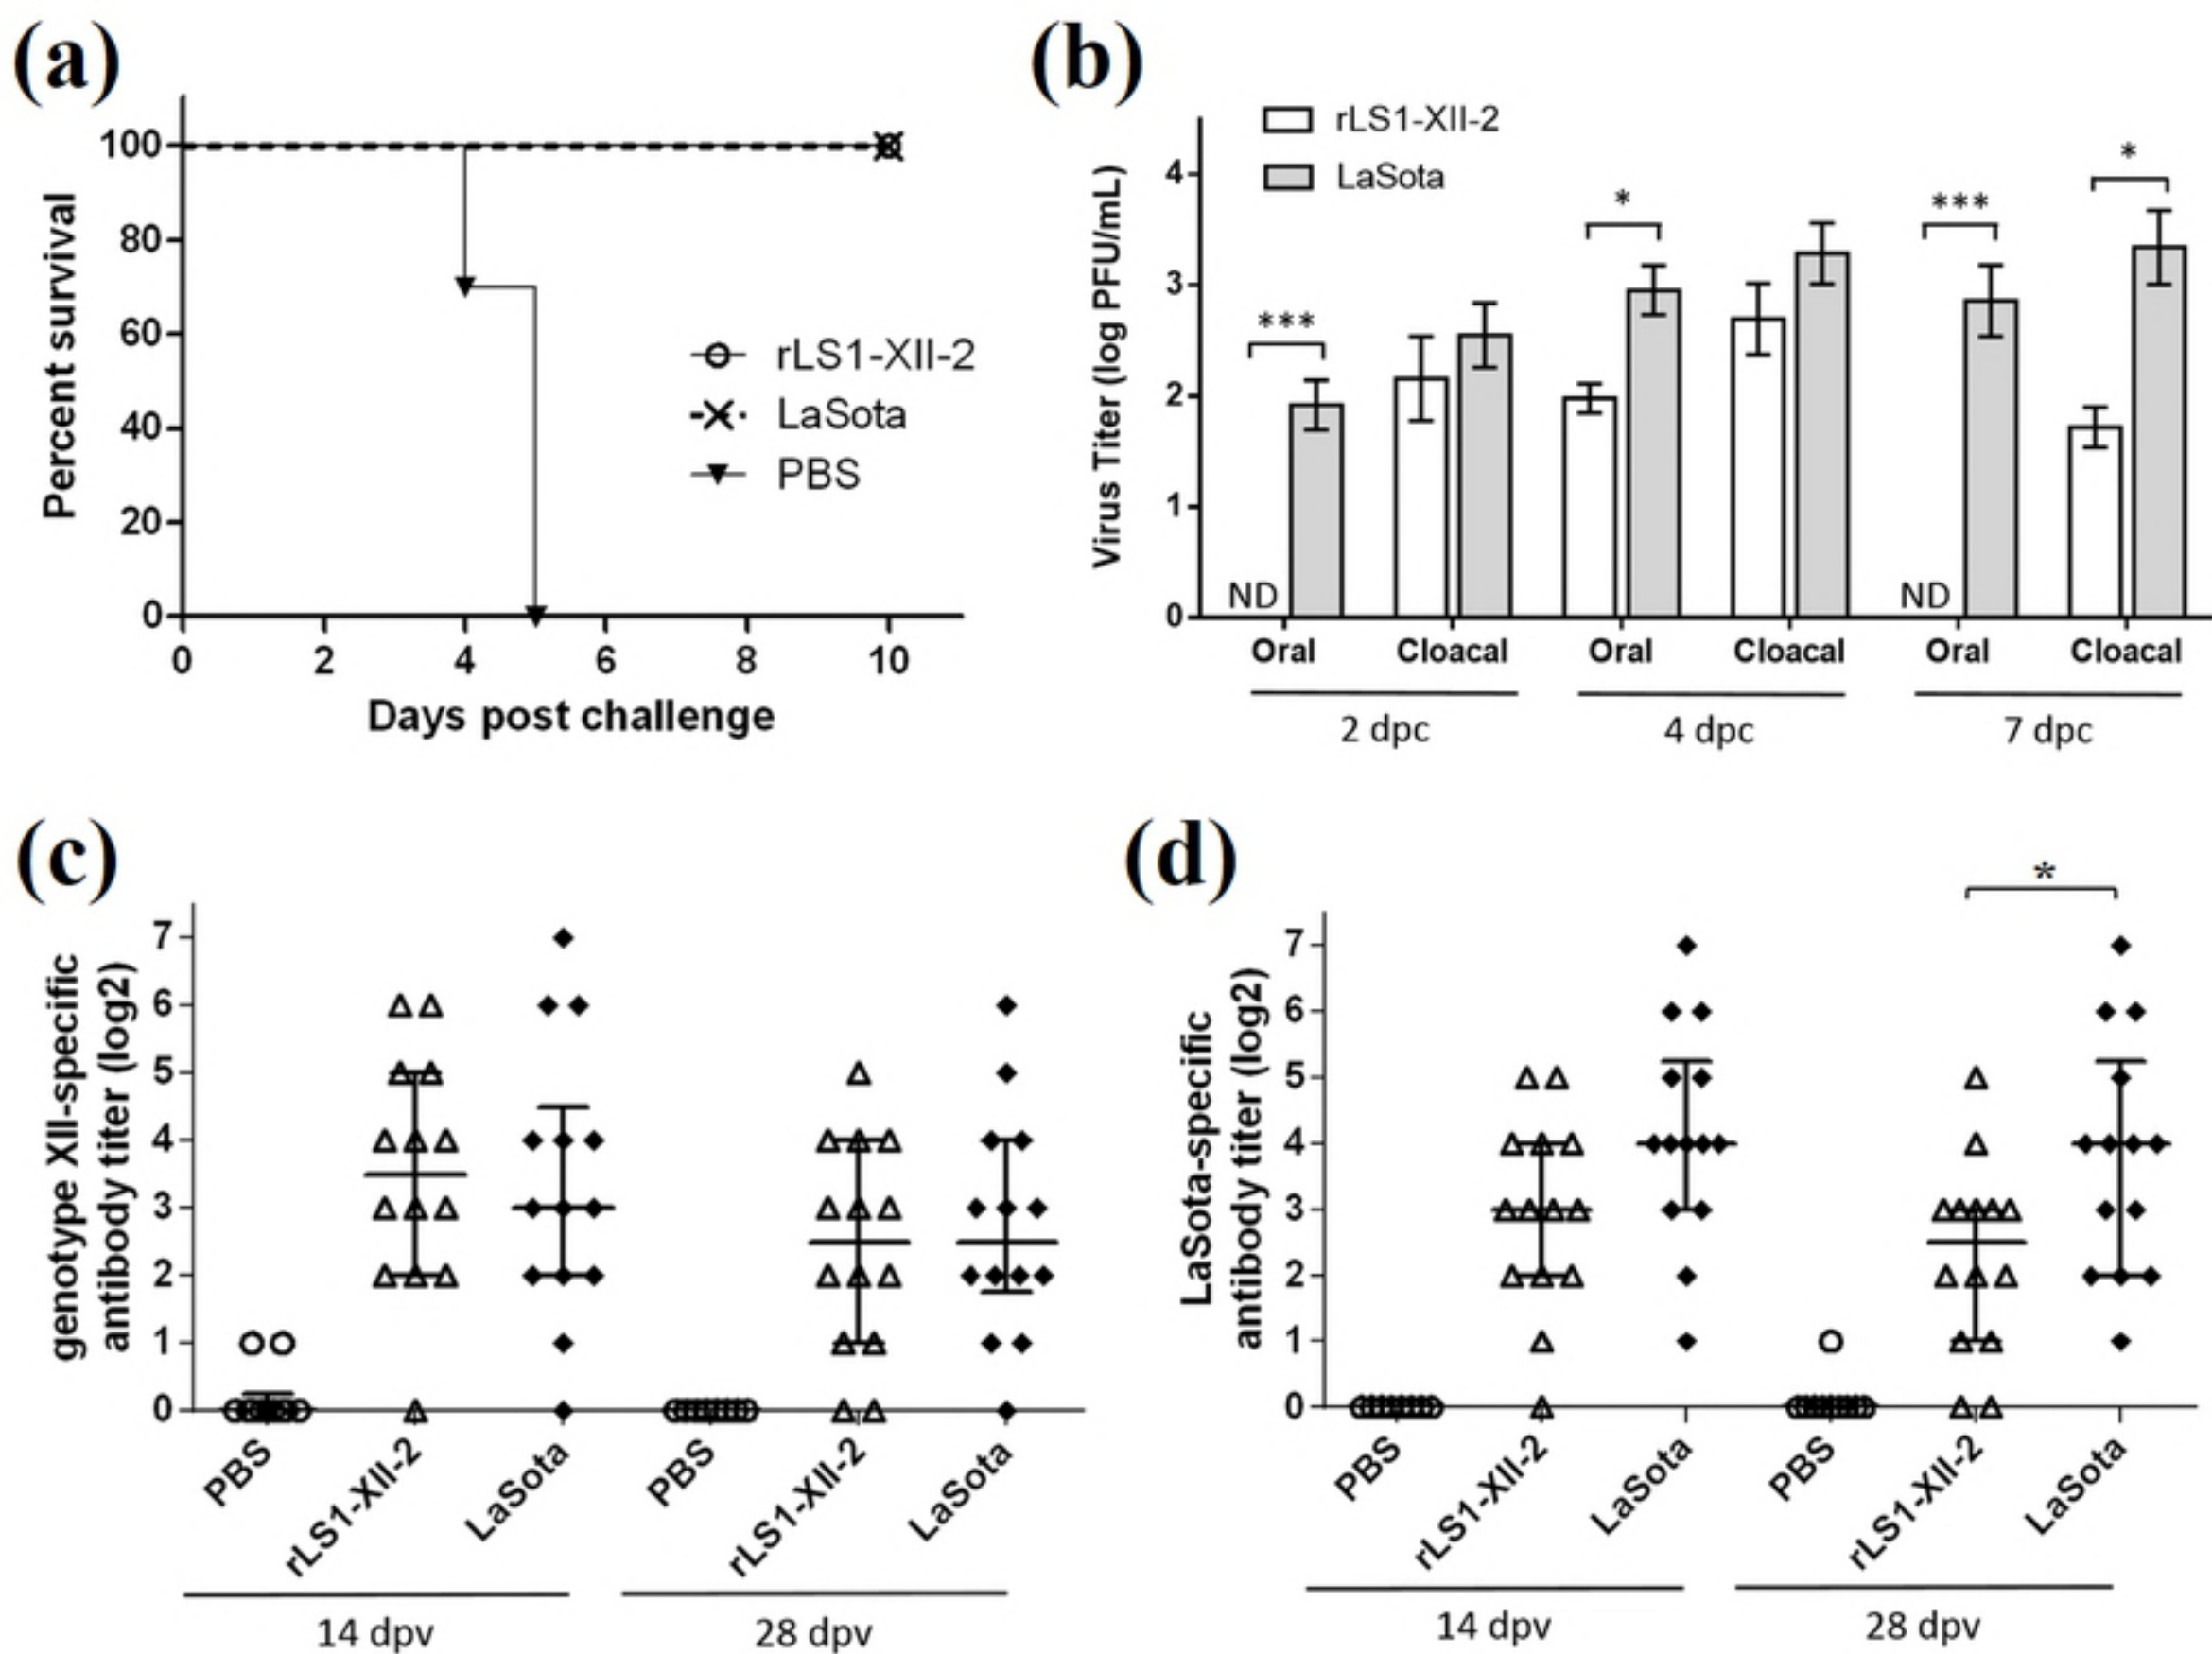

Fig 4

**(a) F protein**

II-LaSota  
VII-Ban/010  
VII-NL/93  
VII-KBNP-4152  
XI-MG 725  
XII-PP2011

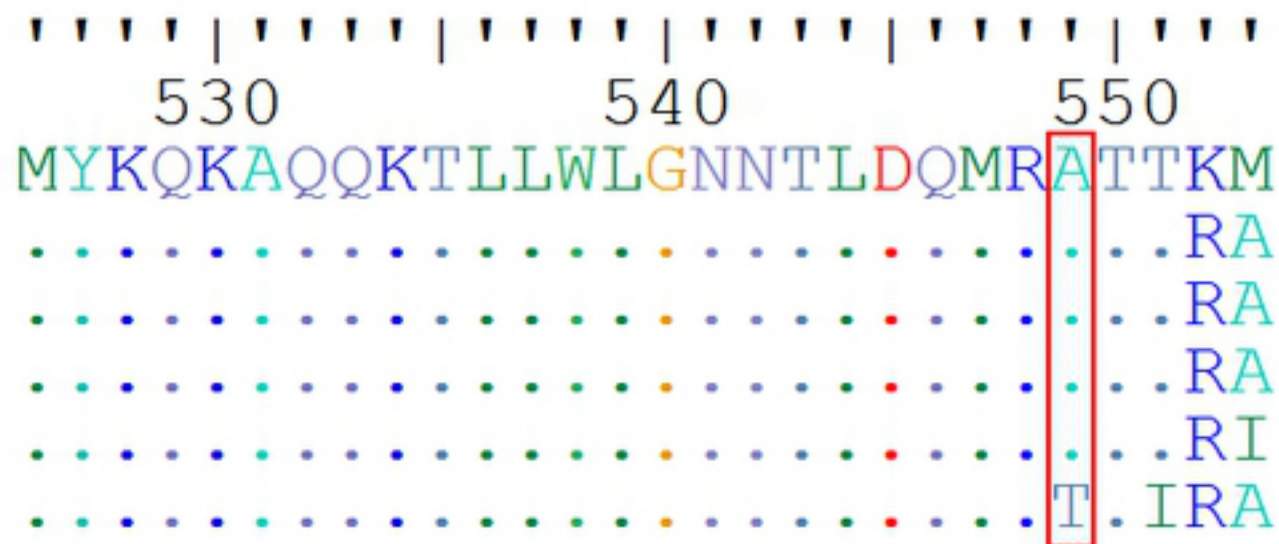

**(b) HN protein**

II-LaSota  
VII-KBNP-4152  
VII-Ban/010  
VII-NL/93  
XI-MG 725  
XII-PP2011

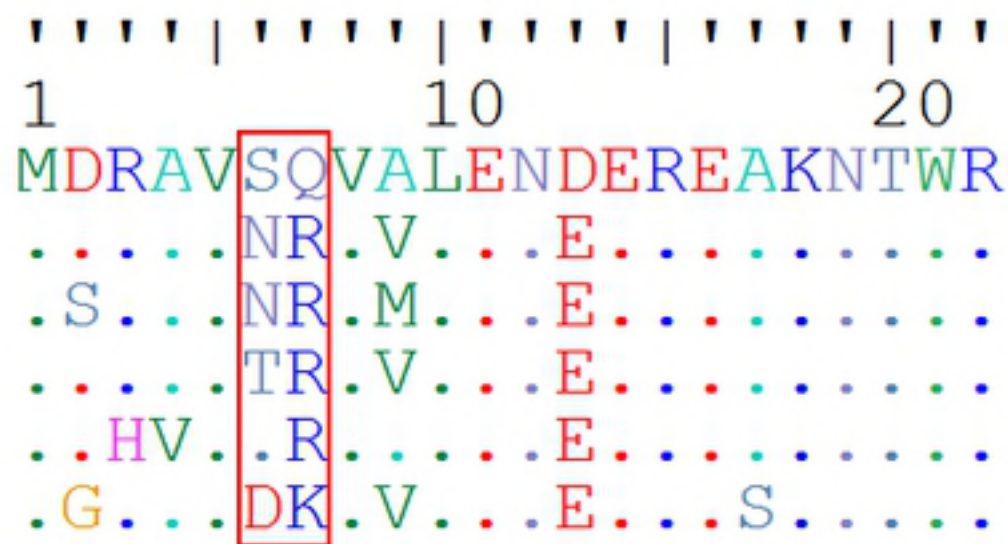

Fig 5
